# Supplementary material for: The path to re-evolve cooperation is constrained in Pseudomonas aeruginosa
Source: PubMed Central journal article supplement (PMC5594463; doi:10.1186/s12862-017-1060-6), 2017-09-11
Supplement: 12862_2017_1060_MOESM1_ESM.pdf [file 12862_2017_1060_MOESM1_ESM.pdf]

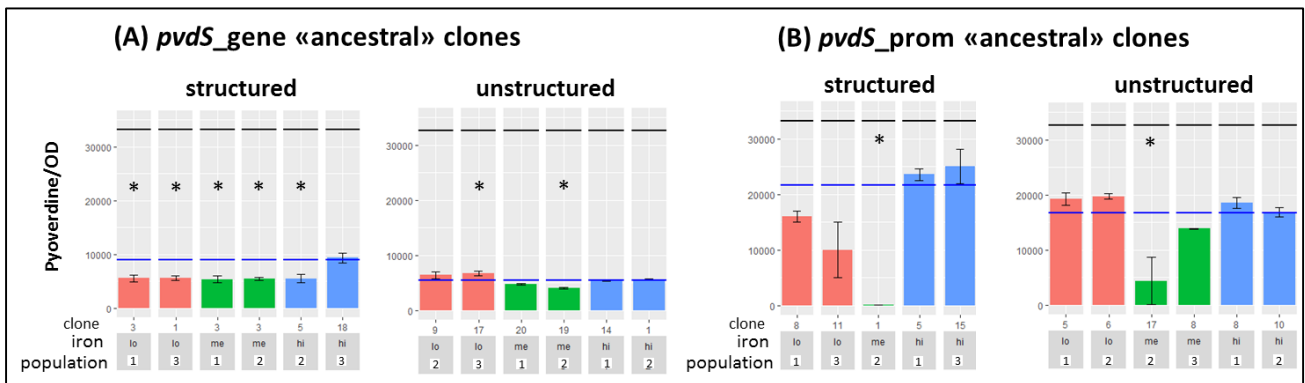

**Fig. S1. Confirmed pyoverdine phenotypes in selected clones.** Evolved clones with ancestral pyoverdine production levels were re-tested to confirm their phenotype. Pyoverdine production was measured in iron-limited media. **(a)** Clones evolved from the low-producer *pvdS\_gene*. **(b)** Clones evolved from the low-producer *pvdS\_prom*. Y axes show pyoverdine-specific fluorescence divided by growth (optical density at 600 nm) after 24 h of incubation. X axes show independent replicate populations the clones evolved in and iron availability during experimental evolution. Bars represent mean values of three replicates per evolved clone. Error bars denote standard error of the mean. The black line represents the average wildtype production level in the same assay, while the blue line denotes the average production level of the respective low-producing ancestor. Bars are coloured by iron availability during evolution: red = low iron; green = medium iron; blue = high iron. We used one-way ANOVAs with Tukey's post-hoc test for comparisons relative to the low-producing ancestor. Asterisks indicate a significant difference ( $p < 0.05$ ) from the ancestor.

**Table S1. Clones selected for in-depth analysis and sequencing**

| Population <sup>1</sup> | clone # | pyoverdine phenotype <sup>2</sup> | <i>pvdS</i> mutation <sup>3</sup> | sequence length [bp] <sup>4</sup> | <i>pvdS</i> status <sup>5</sup> | comment <sup>6</sup>              |
|-------------------------|---------|-----------------------------------|-----------------------------------|-----------------------------------|---------------------------------|-----------------------------------|
| 78_s_hi_2               | 5       | ancestral                         | 2722579 G>C                       | 778                               | ancestral                       |                                   |
| 78_s_hi_3               | 18      | ancestral                         | 2722579 G>C;<br>2722596 A-->C     | 778                               | mutated                         | additional SNP in promoter region |
| 78_s_lo_1               | 3       | ancestral                         | 2722579 G>C                       | 778                               | ancestral                       |                                   |
| 78_s_lo_2               | 12      | low                               | 2722579 G>C                       | 778                               | ancestral                       |                                   |
| 78_s_lo_3               | 1       | ancestral                         | 2722579 G>C                       | 778                               | ancestral                       |                                   |
| 78_s_me_1               | 3       | ancestral                         | 2722579 G>C                       | 778                               | ancestral                       |                                   |
| 78_s_me_2               | 3       | ancestral                         | 2722579 G>C                       | 778                               | ancestral                       |                                   |
| 78_u_hi_1               | 14      | ancestral                         | 2722579 G>C                       | 778                               | ancestral                       |                                   |
| 78_u_hi_1               | 8       | high                              | 2722579 G>C                       | 778                               | ancestral                       |                                   |
| 78_u_hi_2               | 1       | ancestral                         | 2722579 G>C                       | 778                               | ancestral                       |                                   |
| 78_u_hi_2               | 16      | high                              | 2722579 G>C                       | 778                               | ancestral                       |                                   |
| 78_u_lo_1               | 1       | low                               | 2722579 G>C                       | 778                               | ancestral                       |                                   |
| 78_u_lo_1               | 7       | low                               | 2722579 G>C                       | 778                               | ancestral                       |                                   |
| 78_u_lo_1               | 12      | low                               | 2722579 G>C                       | 778                               | ancestral                       |                                   |
| 78_u_lo_1               | 17      | low                               | 2722579 G>C                       | 778                               | ancestral                       |                                   |
| 78_u_lo_1               | 19      | low                               | 2722579 G>C                       | 778                               | ancestral                       |                                   |
| 78_u_lo_2               | 2       | low                               | 2722579 G>C                       | 778                               | ancestral                       |                                   |
| 78_u_lo_2               | 5       | low                               | N/A                               | N/A                               | N/A                             | sequencing failed                 |
| 78_u_lo_2               | 8       | low                               | 2722579 G>C                       | 778                               | ancestral                       |                                   |
| 78_u_lo_2               | 19      | low                               | 2722579 G>C                       | 778                               | ancestral                       |                                   |
| 78_u_lo_2               | 9       | ancestral                         | 2722579 G>C                       | 778                               | ancestral                       |                                   |
| 78_u_lo_3               | 14      | low                               | 2722579 G>C                       | 778                               | ancestral                       |                                   |
| 78_u_lo_3               | 16      | low                               | 2722579 G>C                       | 778                               | ancestral                       |                                   |
| 78_u_lo_3               | 17      | ancestral                         | 2722579 G>C                       | 778                               | ancestral                       |                                   |
| 78_u_me_1               | 20      | ancestral                         | 2722579 G>C                       | 778                               | ancestral                       |                                   |
| 78_u_me_1               | 16      | high                              | 2722579 G>C                       | 778                               | ancestral                       |                                   |
| 78_u_me_2               | 19      | ancestral                         | 2722579 G>C                       | 778                               | ancestral                       |                                   |
| 97_s_hi_1               | 2       | low                               | 2722079 G>T                       | 778                               | ancestral                       |                                   |
| 97_s_hi_1               | 11      | low                               | 2722079 G>T                       | 778                               | ancestral                       |                                   |
| 97_s_hi_1               | 12      | low                               | 2722079 G>T                       | 778                               | ancestral                       |                                   |
| 97_s_hi_1               | 20      | low                               | 2722079 G>T                       | 778                               | ancestral                       |                                   |
| 97_s_hi_1               | 5       | ancestral                         | 2722079 G>T                       | 778                               | ancestral                       |                                   |
| 97_s_hi_2               | 11      | high                              | 2722079 G>T                       | 778                               | ancestral                       |                                   |
| 97_s_hi_2               | 12      | high                              | 2722079 G>T                       | 778                               | ancestral                       |                                   |
| 97_s_hi_2               | 5       | low                               | 2722079 G>T                       | 778                               | ancestral                       |                                   |
| 97_s_hi_2               | 9       | low                               | 2722079 G>T                       | 778                               | ancestral                       |                                   |
| 97_s_hi_2               | 14      | low                               | 2722079 G>T                       | 778                               | ancestral                       |                                   |
| 97_s_hi_2               | 17      | low                               | 2722079 G>T                       | 628                               | ancestral                       | incomplete sequence (-150 bp)     |
| 97_s_hi_2               | 20      | low                               | 2722079 G>T                       | 778                               | ancestral                       |                                   |
| 97_s_hi_3               | 15      | ancestral                         | 2722079 G>T                       | 778                               | ancestral                       |                                   |
| 97_s_lo_1               | 8       | ancestral                         | 2722079 G>T                       | 778                               | ancestral                       |                                   |

|           |    |           |             |     |           |                               |
|-----------|----|-----------|-------------|-----|-----------|-------------------------------|
| 97_s_lo_3 | 11 | ancestral | 2722079 G>T | 778 | ancestral |                               |
| 97_s_me_2 | 7  | low       | 2722079 G>T | 778 | ancestral |                               |
| 97_s_me_2 | 1  | ancestral | 2722079 G>T | 778 | ancestral |                               |
| 97_u_hi_1 | 8  | ancestral | 2722079 G>T | 778 | ancestral |                               |
| 97_u_hi_2 | 10 | ancestral | 2722079 G>T | 683 | ancestral | incomplete sequence (-95 bp)  |
| 97_u_hi_3 | 2  | low       | 2722079 G>T | 778 | ancestral |                               |
| 97_u_hi_3 | 3  | low       | 2722079 G>T | 778 | ancestral |                               |
| 97_u_hi_3 | 8  | low       | 2722079 G>T | 642 | ancestral | incomplete sequence (-136 bp) |
| 97_u_hi_3 | 10 | low       | 2722079 G>T | 639 | ancestral | incomplete sequence (-139 bp) |
| 97_u_hi_3 | 12 | low       | 2722079 G>T | 639 | ancestral | incomplete sequence (-136 bp) |
| 97_u_hi_3 | 14 | low       | 2722079 G>T | 778 | ancestral |                               |
| 97_u_hi_3 | 19 | low       | 2722079 G>T | 778 | ancestral |                               |
| 97_u_lo_1 | 5  | ancestral | 2722079 G>T | 628 | ancestral | incomplete sequence (-150 bp) |
| 97_u_lo_2 | 6  | ancestral | 2722079 G>T | 778 | ancestral |                               |
| 97_u_me_2 | 17 | ancestral | N/A         | N/A | N/A       | sequencing failed             |
| 97_u_me_3 | 8  | ancestral | 2722079 G>T | 778 | ancestral |                               |

<sup>1</sup> 78 = *pvdS*\_gene, 97 = *pvdS*\_prom; s = structured; u= unstructured; lo = iron low; me = iron medium; hi = iron high

<sup>2</sup> pyoverdine phenotype compared to the low-producing ancestor in 1<sup>st</sup> screen (Fig. 3)

<sup>3</sup> genome location in PAO1 reference genome (*pseudomonas.com*) and respective change in nucleotide

<sup>4</sup> length of sequenced promoter region and *pvdS* gene; full sequence length = 778 bp (only *pvdS* gene: 564 bp)

<sup>5</sup> "ancestral": clone harbors only the mutation already present in the low-producing ancestor

"mutated": clone harbors mutation in addition to the one already present in the low-producing ancestor

<sup>6</sup> in case of incomplete sequencing, numbers in brackets indicate number of base pairs missing from the end of the *pvdS* gene
